# Supplementary material for: Reactions at the azomethine CN bonds in the nickel(ii) and copper(ii) complexes of pyridine-containing Schiff-base macrocyclic ligands
Source: Royal Society of Chemistry journal article supplement (doi:10.1039/b308557k), 2003-01-01
Supplement: b308557k.doc [file b308557k.doc]

**Figure S1.** MALDI mass spectra of: (i) pure complex [Cu(L1)](ClO4)2; the doublet (321, 323) corresponds to the molecular ion M+; (ii) complex [Cu(L1)](ClO4)2 refluxed in D2O/EtOD (5 % v/v, pH 8.5) for 10 hrs; the major multiplet at 323-332 corresponds to variable number of incorporated D atoms.

**Figure S2**. Visible spectrum of the arm on/off behavior of [Ni(L5)]2+. Concentration of initial [Ni(L5)](ClO4)2 solution was 0.006 M. The initial 2 mL of solution was titrated with 12 additions of 0.5 L of 1.100 M HClO4. The final acid concentration was 0.003 M.


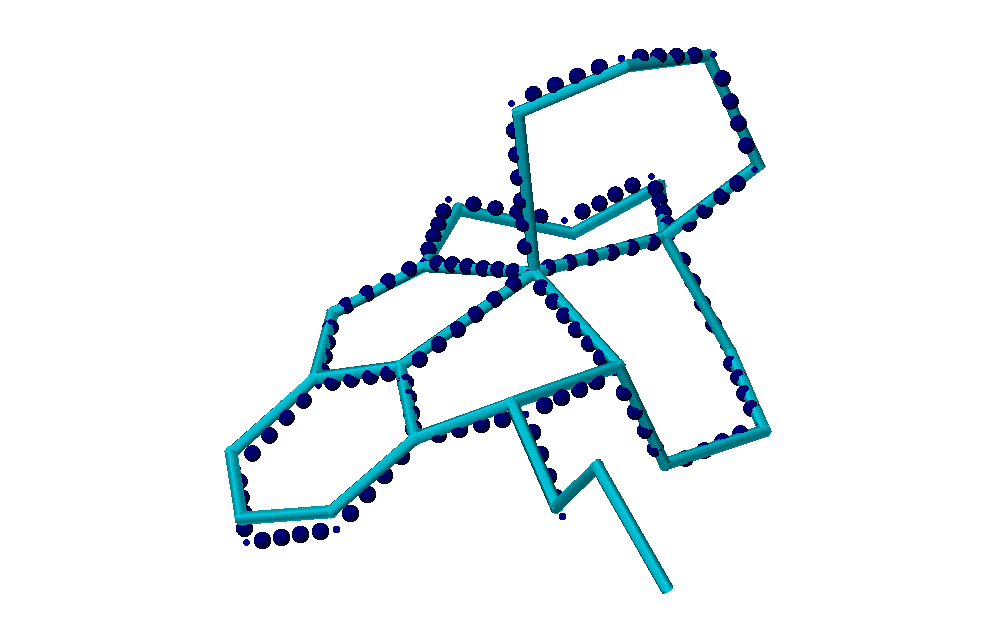


**Figure S3.** Overlay of X-ray structures of [Cu(L6)](ClO4)2 (solid line) and [Cu(L5)](ClO4)2 (dotted line). The atom numbering scheme (identical for both complexes) is the same as that shown in Figure 3.


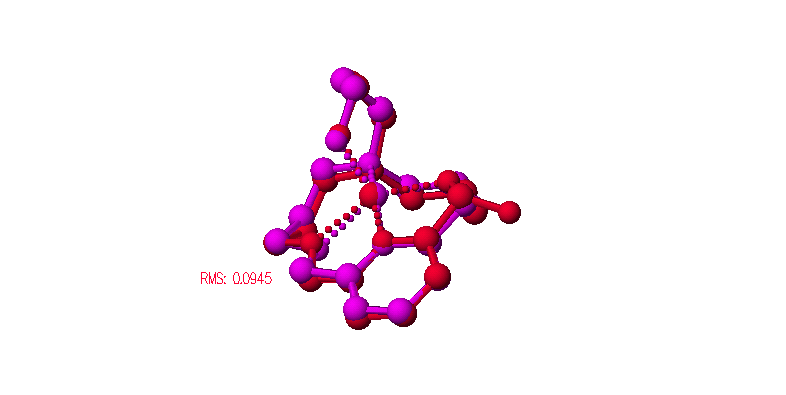


**Figure S4.** Overlay of X-ray structures of [Ni(L5)](ClO4)2 and [Ni(L7)](ClO4)2. The atom numbering scheme (identical for both complexes) is the same as that shown in Figure 3.

**Figure S5.** MALDI mass spectra of: (i) pure complex [Ni(L3)](ClO4)2; the doublet (374, 376) corresponds to the molecular ion M+; (ii) complex [Ni(L3)](ClO4)2 heated in water (pH 8.5) at 750 for 6 hrs; the major peak (doublet at 392, 394) corresponds to (M+18)+ and is characteristic of [Ni(L9)]2+.
